# Supplementary material for: Heterogeneous colorimetric sensor for mercuric saltsElectronic supplementary information (ESI) available: Materials and methods. See http://www.rsc.org/suppdata/cc/b3/b314138a/
Source: Royal Society of Chemistry journal article supplement (doi:10.1039/b314138a), 2004-01-01
Supplement: b314138a.doc [file b314138a.doc]

**MATERIALS AND METHODS.**

The TiO2 paste was prepared from a sol-gel colloidal suspension containing 12.5wt% TiO2 and 6.2wt% Carbowax 20.000. The nanocrystalline TiO2 particles were synthesised by the following procedure: 20 mL of titanium iso-propoxide (Aldrich Co.) were injected into 5.5 g of glacial acetic acid under argon an atmosphere and stirred for 10 min. The mixture was transferred into a flask containing 120 mL of 0.1 M nitric acid at room temperature and stirred vigorously. The flask was left uncovered and heated at 80°C for 8 h. After cooling, the solution was filtered using a 0.45 mm syringe filter, diluted to 5wt% TiO2 by the addition of H2O and then autoclaved at 220°C for 12 h. The colloids were re-dispersed with a 60 s cycle burst form a LDU Soniprobe. Finally, the solution was concentrated to 12.5wt% TiO2 on a rotary evaporator using a membrane vacuum pump at a temperature of 40°C. Carbowax 20.000 was added and the resulting paste was stirred slowly overnight to ensure homogeneity.

For the film TiO2 preparation, 3 mL of the solution detailed above were spread on the glass slides with a glass rod and using adhesive tape as spacers. After the films were dried in air, they were sintered at 450°C for 20 min. The thickness of the TiO2 film was controlled using different tapes and measured using a DEKTAK profilometer. All samples studied on this paper were 4m thickness films.

Sensitization of the TiO2 films was achieved by immersing the films (previously cut in small pieces of 1 cm2 active TiO2 film area) in a 1 mM solution of dye in 1:1 acetonitrile/tert-butyl alcohol overnight, followed by rinsing in ethanol to remove unadsorbed dye.

All metals (Hg(NO3)2, CdI2, Fe(NO3)2,CuSO45H2O, Mg(NO3)2, K2PtCl4, K2PdCl4, CsI, Ca(BF4), K(BF4), Pb(CH3CO2)23H2O, ZnCl2, MnCl24H2O, Mg(CH3CO2)24H2O and Co(NO3)26H2O ) and all anions, as their tetrabutylammonium salts, for the chemical sensing experiments using the TiO2/N719 system were purchased from Aldrich Chemical Co and used as supplied. The electronic absorption spectra were recorded using a double beam Shimadzu 1601 UV-Vis spectrometer. Spectra were not corrected for film scatter, however the films employed were all non-scattering (optical transmission >85 % for wavelengths > 415 nm). All experiments were conducted at room temperature.

Metal and anion sensitivity experiments were carried out on a quartz cuvette with a total volume of 4 mL. The TiO2/N719 film was immersed on the aqueous solution and the cuvette fixed to the Uv-Vis spectrophotometer holder. The UV-Vis absorption spectra were recorded immediately after addition of the corresponding analyte using Hamilton® Gas Chromatography syringes (accuracy is ±1% of syringe volume, with ±1% repeatability). All experiments were repeated at least 4 times to ensure reproducibility. The lower limit of Hg2+ detection reported in the manuscript (0.5 ppm) is the average value of 4 experimental measurements that corresponds to the concentration of Hg2+ at which the signal magnitude exceeds the random experimental noise ( 1 standard deviation). Micro- and millimolar solutions for the all the metal and anion salts studied in this paper were prepared in distilled water (pH ~5 units). For accurate weighing of the salts a Satorius® BP analytical balance with readability up to 0.1 mg with ±0.1 mg reproducibility was used. The value for the change in a for each experimental point were the average of at list 3 different
